# Supplementary material for: Human-wildlife conflicts with crocodilians, cetaceans and otters in the tropics and subtropics
Source: PeerJ. 2022 Jan 4;10:e12688. doi: 10.7717/peerj.12688 (PMC8740516; doi:10.7717/peerj.12688)
Supplement: Supplemental Information 1 — (1) a summary of the literature review, including references for all sources; (2) a summary of the species included in the literature review, including body mass, conservation status and the severity of conflicts for each species; and (3) the raw data from interviews on aquatic human-wildlife conflicts in the Brazilian Amazon. [file peerj-10-12688-s001.xlsx]

## Sheet: Literature Review
Reference	Year	Location	Category	African Dwarf Crocodile (Osteolaemus tetraspis)	West African Crocodile (Crocodylus suchus)	Slender-snouted Crocodile (Mecistops cataphractus)	American Alligator (Alligator mississippiensis)	Black Caiman (Melanosuchus niger)	Spectacled Caiman (Caiman crocodilus)	Broud-snouted Caiman (Caiman latirostris)	Yacaré (Caiman yacare)	Smooth-fronted Caiman (Paleosuchus trigonatus)	American Crocodile (Crocodylus acutus)	Morelet's Crocodile (Crocodylus moreletii)	Saltwater Crocodile (Crocodylus porosus)	Australian Freshwater Crocodile (Crocodylus johnstoni)	Nile Crocodile (Crocodylus niloticus)	Mugger (Crocodylus palustris)	Gharial (Gavialis gangeticus)	Irrawaddy Dolphin (Orcaella brevirostris)	South Asian River Dophin (Platanista gangetica)	Amazon River Dolphin (Inia geoffrensis)	Tucuxi (Sotalia fluviatilis)	Baiji (Lipotes vexillifer)	Yangtze Finless Porpoise (Neophocaena asiaeorientalis ssp. asiaeorientalis)	Giant Otter (Pteronura brasiliensis)	North American River Otter (Lontra canadensis)	Neotropical River Otter (Lontra longicaudis)	Asian Small-clawed Otter (Aonyx cinereus)	Smooth-coated Otter (Lutrogale perspicillata)	Congo Clawless Otter (Aonyx congicus)	Spotted-necked Otter (Hydrictis maculicollis)	African Clawless Otter (Aonyx capensis)
Akpona, A.H., Djagoun, C.A.M.S., Harrington, L.A., Kabré, A.T., Mensah, G.A., Sinsin, B., 2015. Conflict between spotted-necked otters and fishermen in Hlan River, Benin. Journal for nature conservation, 27, pp.63-71, DOI: 10.1016/j.jnc.2015.06.007.	2015	Benin	Economic, Livelihood and Competition																													1
Alary, F., Moutou, F., Jacques, H., 2002. Still on the tracks of the Congo clawless otter (Aonyx congicus): first mission in Cameroon. IUCN Otter Specialist Group Bulletin, 19(1), 51-55.	2011	Benin	Economic, Livelihood and Competition																													1
Alary, F., Moutou, F., Jacques, H., 2002. Still on the tracks of the Congo clawless otter (Aonyx congicus): first mission in Cameroon. IUCN Otter Spec. Group Bull, 19(1), pp.51-55.	2002	Cameroon	Economic, Livelihood and Competition																												1	1
Aliaga-Rossel, E., 2002. Distribution and abundance of the river dolphin (Inia geoffrensis) in the Tijamuchi River, Beni, Bolivia. Aquatic mammals, 28(3), pp.312-323.	2002	Bolivia	Entanglement																			1
Al-Sheikhly, O.F. and Nader, I.A., 2013. The status of Iraq smooth-coated otter Lutrogale perspicillata maxwelli Hayman 1956 and Eurasian otter Lutra lutra Linnaeus 1758 in Iraq. IUCN Otter Specialist Group Bulletin, 30(1), pp.18-30.	2013	Iraq	Economic, Livelihood and Competition																											1
Alves, L.C.P.D.S., Zappes, C.A., Andriolo, A., 2012. Conflicts between river dolphins (Cetacea: Odontoceti) and fisheries in the central Amazon: a path toward tragedy? Zoologia, 29(5), 420-429 DOI: 10.1590/S1984-46702012000500005.	2012	Brazil	Economic, Livelihood and Competition																			1	1
Alves, Rômulo Romeu Nóbrega, Kleber Silva Vieira, Gindomar Gomes Santana, Washington Luiz Silva Vieira, Waltécio Oliveira Almeida, Wedson Medeiros Silva Souto, Paulo Fernando Guedes Pereira Montenegro, and Juarez Carlos Brito Pezzuti. "A review on human attitudes towards reptiles in Brazil." Environmental Monitoring and Assessment 184, no. 11 (2012): 6877-6901, DOI: 10.1007/s10661-011-2465-0.	2012	Brazil	Perceptions					1	1	1	1	1
Amarasinghe, A.T., Madawala, M.B., Karunarathna, D.S., Manolis, S.C., de Silva, A. and Sommerlad, R., 2015. Human-crocodile conflict and conservation implications of saltwater crocodiles Crocodylus porosus (Reptilia: Crocodylia: Crocodylidae) in Sri Lanka. Journal of Threatened Taxa, 7(5), pp.7111-7130, DOI: 10.11609/JoTT.o4159.7111-30.	2015	Sri Lanka	Management (inc Population Management)												1
Andarge, E., Wube, T. and Balakrishnan, M., 2017. Diet analysis of the African clawless otter (Aonyx capensis) in and around Lake Tana. Journal of Ecology and The Natural Environment, 9(4), pp.53-61.	2017	Ethiopia	Economic, Livelihood and Competition																														1
Andrade, A.M., Arcoverde, D.L. and Albernaz, A.L., 2019. Relationship of Neotropical otter vestiges with environmental and anthropogenic factors. Acta Amazonica, 49(3), pp.183-192, DOI: 10.1590/1809-4392201801122.	2019	Brazil	Economic, Livelihood and Competition																									1
Andrade-Ponce, G.P. and Angarita-Sierra, T., 2017. Notable altitudinal range expansion of Lontra longicaudis (Carnivora: Mustelidae) in Colombian Paramos. Therya, 8(1), pp.75-78.	2017	Colombia	Economic, Livelihood and Competition																									1
Aranda-Coello, J.M., Arévalo-Hueso, E., Burbano, D., Coello, H., Cortéz, J., Díaz, N., Guerra, L., Guevara, C., Gutiérrez, D., Ioli, G. and Jiménez, R., 2015. Opinión de pescadores sobre el Caiman crocodilus (Crocodilia: Alligatoridae) del Refugio de Vida Silvestre Caño Negro, Costa Rica. Cuadernos de Investigación UNED, 7(2), pp.143-149.	2015	Costa Rica	Perceptions						1
Atigre, R.H., 2018. Crocodiles of river Krishna: impact on agriculture, economy, and the sociology of human population in Sangli, Maharashtra, India. Journal of Threatened Taxa, 10(11), pp.12571-12576, DOI: 10.11609/jott.3501.10.11.12571-12576.	2018	India	Attacks															1
Aust, P., Boyle, B., Fergusson, R., Coulson, T. 2009. The impact of Nile crocodiles on rural livelihoods in northeastern Namibia. South African Journal of Wildlife Research, 39(1), 57-69. DOI: 10.3957/056.039.0107.	2009	Namibia	Attacks and Economics														1
Barbieri, F., Machado, R., Zappes, C.A., Oliveira, L.R.D., 2012. Interactions between the Neotropical otter (Lontra longicaudis) and gillnet fishery in the southern Brazilian coast. Ocean and Coastal Management, 63, 16-23. DOI: 10.1016/j.ocecoaman.2012.03.007.	2012	Brazil	Economic, Livelihood and Competition																									1
Bashir, T., Khan, A., Gautam, P. and Behera, S.K., 2010. Abundance and prey availability assessment of Ganges river dolphin (Platanista gangetica gangetica) in a stretch of upper Ganges River, India. Aquatic Mammals, 36(1).	2010	India	Entanglement																		1
Beasley, I., Pollock, K., Jefferson, T.A., Arnold, P., Morse, L., Yim, S., Lor Kim, S. and Marsh, H., 2013. Likely future extirpation of another Asian river dolphin: The critically endangered population of the Irrawaddy dolphin in the Mekong River is small and declining. Marine Mammal Science, 29(3), pp.E226-E252, DOI: 10.1111/j.1748-7692.2012.00614.x.	2013	Multiple Countries	Entanglement																	1
Belanger, M., Clough, N., Askin, N., Tan, L.,Wittnich, C., 2011. A Review of Violent or Fatal Otter Attacks. IUCN Otter Spec. Group Bulletin. 28 (1): 11 – 16.	2011	Global	Attacks																								1
Bergamasco, J.J.C., Pereira, R.M., Rodriguez, J.E.R. and Cabral, B.T.F., 2018. Thoracic trauma by black caiman's bite in the Amazon region. The Journal of Cardiothoracic Trauma, 3(1), p.24.	2018	Brazil	Attacks					1
Brackhane, S., Webb, G., Xavier, F.M., Gusmao, M., Pechacek, P., 2018. When conservation becomes dangerous: human‐crocodile conflict in Timor‐Leste. The Journal of Wildlife Management, 82(7), pp.1332-1344. DOI: 10.1002/jwmg.21497.	2018	Timor Leste	Attacks												1
Brackhane, S., Webb, G., Xavier, F.M., Trindade, J., Gusmao, M. and Pechacek, P., 2019. Crocodile management in Timor-Leste: drawing upon traditional ecological knowledge and cultural beliefs. Human Dimensions of Wildlife, 24(4), pp.314-331, DOI: 10.1080/10871209.2019.1614240.	2019	Timor Leste	Perceptions												1
Brien, M.L., Gienger, C.M., Browne, C.A., Read, M.A., Joyce, M.J. and Sullivan, S., 2017. Patterns of human–crocodile conflict in Queensland: a review of historical estuarine crocodile (Crocodylus porosus) management. Wildlife Research, 44(4), pp.281-290, DOI: 10.1071/WR17011.	2017	Australia	Attacks												1
Brownell Jr, R.L., Reeves, R.R., Read, A.J., Smith, B.D., Thomas, P.O., Ralls, K., Amano, M., Berggren, P., Chit, A.M., Collins, T. and Currey, R., 2019. Bycatch in gillnet fisheries threatens Critically Endangered small cetaceans and other aquatic megafauna. Endangered Species Research, 40, pp.285-296, DOI: 10.3354/esr00994.	2019	Global	Entanglement																	1				1	1
Burgin, S. and Hardiman, N., 2016. Crocodiles and grey nomads: a deadly combination?. Current Issues in Tourism, 19(1), pp.60-63, DOI: 10.1080/13683500.2015.1121976.	2016	Australia	Attacks												1
Butler, J., 1993. Resource use within the crab-eating guild in upper Kairezi River, Zimbabwe: Proposed Project. IUCN Otter Specialist Group Bulletin, 8, pp.6-9.	1993	Zimbabwe	Economic, Livelihood and Competition																														1
Butler, J., 1994. Cape clawless otter conservation and a trout river in Zimbabwe: a case study. Oryx, 28(4), pp.276-282.	1994	Zimbabwe	Economic, Livelihood and Competition																														1
Caldicott, D.G., Croser, D., Manolis, C., Webb, G., Britton, A., 2005. Crocodile attack in Australia: an analysis of its incidence and review of the pathology and management of crocodilian attacks in general. Wilderness and Environmental Medicine, 16(3), 143-159. DOI: 10.1580/1080-6032(2005)16[143:CAIAAA]2.0.CO;2.	2005	Australia	Attacks												1
Campbell, E., Mangel, J.C., Alfaro-Shigueto, J., Mena, J.L., Thurstan, R.H. and Godley, B.J., 2020. Coexisting in the Peruvian Amazon: Interactions between fisheries and river dolphins. Journal for Nature Conservation, 56, p.125859. DOI: 10.1016/j.jnc.2020.125859	2020	Peru	Economic, Livelihood and Competition																			1	1
Campbell, H.A., Dwyer, R.G., Wilson, H., Irwin, T.R. and Franklin, C.E., 2015. Predicting the probability of large carnivore occurrence: a strategy to promote crocodile and human coexistence. Animal Conservation, 18(4), pp.387-395, DOI: 10.1111/acv.12186.	2015	Australia	Management (inc Population Management)												1
Carter, S.K. and Rosas, F.C., 1997. Biology and conservation of the giant otter Pteronura brasiliensis. Mammal Review, 27(1), pp.1-26.	1997	Multiple Countries	Economic, Livelihood and Competition																							1
Chattopadhyay, S., Shee, B. and Sukul, B., 2013. Fatal crocodile attack. Journal of forensic and legal medicine, 20(8), pp.1139-1141, DOI: 10.1016/j.jflm.2013.09.005.	2013	India	Attacks												1
Choudhary, S.K., Smith, B.D., Dey, S., Dey, S., Prakash, S., 2006. Conservation and biomonitoring in the Vikramshila gangetic dolphin sanctuary, Bihar, India. Oryx, 40(2), 189-197. DOI: 10.1017/S0030605306000664.	2006	India	Entanglement																		1
Corvera, M.D., Manalo, R.I. and Aquino, M.T.R., 2017. People and crocodiles sharing one environment: an analysis of local human–crocodile conflict management strategies in the Philippines. Journal of Animal Science and Research, 1, pp.1-6. DOI:10.16966/jasr.105	2017	Phillippines	Attacks												1
D’Lima, C., Marsh, H., Hamann, M., Sinha, A., Arthur, R., 2014. Positive interactions between irrawaddy dolphins and artisanal fishers in the Chilika Lagoon of Eastern India are driven by ecology, socioeconomics, and culture. Ambio, 43(5), pp.614-624. DOI: 10.1007/s13280-013-0440-4.	2014	India	Positive Interaction																	1
da Silva, V.M., Freitas, C.E., Dias, R.L., Martin, A.R., 2018. Both cetaceans in the Brazilian Amazon show sustained, profound population declines over two decades. PloS one, 13(5), p.e0191304. DOI: 10.1371/journal.pone.0191304.	2018	Brazil	Economic, Livelihood and Competition																			1	1
Das, C.S., Jana, R., 2018. Human–crocodile conflict in the Indian Sundarban: an analysis of spatio-temporal incidences in relation to people's livelihood. Oryx, 52(4), pp.661-668, DOI: 10.1017/S0030605316001502/.	2018	India	Attacks												1
de Castro, F.R., Stutz-Reis, S., Reis, S.S., Nakano-Oliveira, E. and Andriolo, A., 2014. Fishermen's perception of Neotropical otters (Lontra longicaudis) and their attacks on artisanal fixed fence traps: The case of caiçara communities. Ocean & Coastal Management, 92, pp.19-27,10.1016/j.ocecoaman.2014.01.008.	2014	Brazil	Economic, Livelihood and Competition																									1
Dias, S., Verdade, L., Prado, B., Almeida, N., Santos-Reis, M. and Pedroso, N., 2019. Neotropical Otters as Promoters of Environmental Awareness.	2019	Brazil	Perceptions																									1
Dunham, K.M., Ghiurghi, A., Cumbi, R. and Urbano, F., 2010. Human–wildlife conflict in Mozambique: a national perspective, with emphasis on wildlife attacks on humans. Oryx, 44(2), pp.185-193, DOI: 10.1017/S003060530999086X.	2010	Mozambique	Attacks														1
Eniang, E.A., Akani, G.C., Dendi, D., Fa, J. and Luiselli, L., 2020. People’s perceptions of crocodiles in Nigeria. Herpetological Journal, pp.112-116.	2020	Nigeria	Perceptions	1	1	1
Ergete, Engedasew Andarge, Tilaye Wube Hailemariam, Mundanthra Balakrishnan, and Thomas L. Serfass. "Fishermen knowledge and conflict with African clawless otters in and around Lake Tana, Ethiopia." African Journal of Ecology 56, no. 2 (2017): 409-413, DOI: 10.1111/aje.12447.	2018	Ethiopia	Economic, Livelihood and Competition																														1
Evans, L.J., Davies, A.B., Goossens, B. and Asner, G.P., 2017. Riparian vegetation structure and the hunting behavior of adult estuarine crocodiles. PloS one, 12(10), p.e0184804, DOI: 10.1371/journal.pone.0184804.	2017	Malaysia	Management (inc Population Management)												1
Eversol, C.B., Henke, S.E., Ogdee, J.L., Wester, D.B. and Cooper, A., 2014. Nuisance American alligators: an investigation into trends and public opinion. Human–Wildlife Interactions, 8(1), p.2.	2014	USA	Management (inc Population Management)				1
Fahrni-Mansur, E., Smith, B.D., Mansur, R.M. and Diyan, M.A.A., 2008. Two incidences of fishing gear entanglement of Ganges River dolphins Platanista gangetica gangetica in waterways of the Sundarbans mangrove forest, Bangladesh. Aquatic Mammals, 34(2), pp.362-366.	2008	Bangladesh	Entanglement																		1
Fonseca, V., Marmontel, M., 2011. Local knowledge and conflicts with otters in western Brazilian Amazon: a preliminary report. IUCN Otter Specialists Group Bulletin, 28(B), 64-68.	2011	Brazil	Economic, Livelihood and Competition																							1
Fukuda, Y., Manolis, C., Appel, K., 2014. Featured article: management of human‐crocodile conflict in the Northern Territory, Australia: review of crocodile attacks and removal of problem crocodiles. The Journal of Wildlife Management, 78(7), 1239-1249. DOI: 10.1002/jwmg.767.	2014	Australia	Attacks												1
Fukuda, Y., Manolis, C., Saalfeld, K. and Zuur, A., 2015. Dead or alive? Factors affecting the survival of victims during attacks by saltwater crocodiles (Crocodylus porosus) in Australia. PLoS One, 10(5), p.e0126778. DOI: 10.1371/journal.pone.0126778.	2015	Australia	Attacks												1
Fukuda, Y., Webb, G., Edwards, G., Saalfeld, K., Whitehead, P., 2020. Harvesting predators: simulation of population recovery and controlled harvest of saltwater crocodiles Crocodylus porosus. Wildlife Research. DOI: 10.1071/WR20033.	2020	Australia	Management (inc Population Management)												1
Fukuda, Y., Webb, G., Manolis, C., Delaney, R., Letnic, M., Lindner, G. and Whitehead, P., 2011. Recovery of saltwater crocodiles following unregulated hunting in tidal rivers of the Northern Territory, Australia. The Journal of Wildlife Management, 75(6), pp.1253-1266, DOI: 10.1002/jwmg.191.	2011	Australia	Management (inc Population Management)												1
Fukuda, Y., Webb, G., Manolis, C., Lindner, G., Banks, S., 2019. Translocation, genetic structure and homing ability confirm geographic barriers disrupt saltwater crocodile movement and dispersal. PloS one, 14(8), p.e0205862. DOI: 10.1371/journal.pone.0205862.	2019	Australia	Management (inc Population Management)												1
Gómez, J.R. and Jorgenson, J.P., 1999. An Overview of the Giant Otter-Fisherman Problem in the Orinoco Basin of Colombia IUCN Otter Spec. Group Bull, 16(2), pp.90-96.	2011	Colombia	Economic, Livelihood and Competition																							1
Gopi, G. V., Pandav, B., 2009. Humans sharing space with Crocodylus porosus in Bhitarkanika wildlife sanctuary: conflicts and options. Current Science, 96(4), 459-460.	2009	India	Attacks												1
Govind, S.K, Jayson, E.A., 2018. Attack of Otter on Humans in Thrissur, Kerala, India. IUCN Otter Spec. Group Bull, 35(1), pp.57-61.	2018	India	Attacks																											1
Gruen, Russell L. "Crocodile attacks in Australia: challenges for injury prevention and trauma care." World journal of surgery 33, no. 8 (2009): 1554-1561.	2009	Australia	Attacks												1
Haddad Jr, V. and Fonseca, W.C., 2011. A fatal attack on a child by a black caiman (Melanosuchus niger). Wilderness & environmental medicine, 22(1), pp.62-64, DOI: 10.1016/j.wem.2010.11.010.	2011	Brazil	Attacks					1
Harding, B.E. and Wolf, B.C., 2006. Alligator attacks in southwest Florida. Journal of forensic sciences, 51(3), pp.674-677, DOI: 10.1111/j.1556-4029.2006.00135.x.	2006	USA	Attacks				1
Hernández-Romero, P.C., Botello López, F.J., Hernández García, N. and Espinoza Rodríguez, J., 2018. New altitudinal record of Neotropical otter (Lontra longicaudis Olfers, 1818) and conflict with fish farmers in Mexico. IUCN Otter Specialist Group Bulletin, 35(4), pp.193-197.	2018	Mexico	Economic, Livelihood and Competition																									1
Hertner, G., 2006. Caiman bite. Wilderness & environmental medicine, 17(4), pp.267-270, DOI: 10.1580/PR40-05.1.	2006	Brazil	Attacks						1
Hines, K.N., 2010. Australian Freshwater Crocodile. Herpetological Review, 41(4), pp.430-433.	2010	Australia	Attacks													1
Hines, T.C. and Keenlyne, K.D., 1977. Two incidents of alligator attacks on humans in Florida. Copeia, pp.735-738.	1977	USA	Attacks				1
Hussain, S.A., Gupta, S.K., De Silva, P.K., 2011. Biology and ecology of Asian small-clawed otter Aonyx cinereus (Illiger, 1815): a review. IUCN Otter Specialist Group Bulletin, 28(2), 63-75.	2011	Multiple Countries	Economic, Livelihood and Competition																										1	1
Ijeomah, H.M. and Efenakpo, O.D., 2012. Analysis of Nile crocodile (Crocodylus nilotica) hunting in selected communities around fresh water and salt water transitional areas of Rivers State, Nigeria. Tropical Agricultural Research and Extension, 14(4)	2011	Nigeria	Economic, Livelihood and Competition														1
Iriarte, V. and Marmontel, M., 2013. Insights on the use of dolphins (boto, Inia geoffrensis and tucuxi, Sotalia fluviatilis) for bait in the piracatinga (Calophysus macropterus) fishery in the western Brazilian Amazon. Journal of Cetacean Research and Management, 13(2), pp.163-173.	2013	Brazil	Entanglement					1	1													1	1
Jacques, H., Moutou, F., Alary, F., 2002. On the tracks of the Congo clawless otter (Aonyx congicus) in Gabon. IUCN Otter Specialist Group Bulletin, 19(1), 40-50.	2002	Gabon	Economic, Livelihood and Competition																												1	1
Jayson, E.A., Sivaperuman, C., Padmanabhan, P., 2006. Review of the reintroduction programme of the mugger crocodile Crocodylus palustris in Neyyar reservoir, India. The Herpetological Journal, 16(1), 69-76	2006	India	Attacks and Economics															1
Jordaan, R.K., Somers, M.J., Hall, G. and McIntyre, T., 2020. The diet of spotted-necked otters foraging in trout-stocked waters in Mpumalanga, South Africa. African Zoology, 55(2), pp.141-148.	2020	South Africa	Economic, Livelihood and Competition																													1
Kar, S.K. and Bustard, H.R., 1983. Saltwater crocodile attacks on man. Biological Conservation, 25(4), pp.377-382.	1983	India	Attacks												1
Kelkar, N. and Dey, S., 2020. Mesh mash: Legal fishing nets cause most bycatch mortality of endangered South Asian river dolphins. Biological Conservation, 252, p.108844.	2020	India	Entanglement																		1
Kelkar, N., Krishnaswamy, J., Choudhary, S., Sutaria, D., 2010. Coexistence of fisheries with river dolphin conservation. Conservation Biology, 24(4), 1130-1140. DOI: 10.1111/j.1523-1739.2010.01467.x.	2010	India	Economic, Livelihood and Competition																		1
Khan, W.A., Qasim, M., Ahmad, E., Chaudhry, A.A., Bhaagat, H.B. and Akhtar, M., 2010. Status of smooth coated otter (Lutrogale perspicillata sindica) in Pakistan. Pakistan Journal of Zoology, 42(6).	2010	Pakistan	Economic, Livelihood and Competition																											1
Khoo, M.D.Y. and Lee, B.H., 2020. The urban Smooth‐coated otters Lutrogale perspicillata of Singapore: a review of the reasons for success. International Zoo Yearbook, DOI: 10.1111/izy.12262.	2020	Singapore	Economic, Livelihood and Competition; Perceptions									1																		1
Kofron, C.P. and Chapman, A., 2006. Causes of mortality to the endangered southern cassowary Casuarius casuarius johnsonii in Queensland, Australia. Pacific Conservation Biology, 12(3), pp.175-179, DOI: 10.1071/PC060175.	2004	Australia	Management (inc Population Management)												1
Kolipakam, V., Singh, S., Ray, S., Prasad, L., Roy, K., Wakid, A. and Qureshi, Q., 2020. Evidence for the continued use of river dolphin oil for bait fishing and traditional medicine: implications for conservation. Heliyon, 6(8), p.e04690, DOI: 10.1016/j.heliyon.2020.e04690.	2020	India	Entanglement																		1
Kumar, A., Kumar, S., Zaidi, Y.F. and Kanaujia, A., 2012. A review on status and conservation of salt water crocodile (Crocodylus porosus) in India. International Day for Biological Diversity: Marine biodiversity.	2012	India	Management (inc Population Management)												1
Langley, R.L., 2005. Alligator attacks on humans in the United States. Wilderness & environmental medicine, 16(3), pp.119-124, DOI: 10.1580/1080-6032(2005)16[119:AAOHIT]2.0.CO;2Get rights a.	2005	USA	Attacks				1
Lasmar, R.P., dos Santos Lima, D. and Marmontel, M., 2013. What do local fishermen from the mid Solimões river think about the giant river otter?. Natural Resources, 3(1), pp.42-48.	2013	Brazil	Perceptions																							1
Leatherwood, S., Reeves, R.R., 1994. River dolphins: a review of activities and plans of the cetacean specialist group. Aquatic Mammals, 20, 137-154.	1994	Global	Entanglement																	1	1	1		1
Letnic, M. and Connors, G., 2006. Changes in the distribution and abundance of saltwater crocodiles (Crocodylus porosus) in the upstream, freshwater reaches of rivers in the Northern Territory, Australia. Wildlife Research, 33(7), pp.529-538, DOI: 10.1071/WR05090.	2006	Australia	Management (inc Population Management)												1
Letnic, M., Carmody, P. and Burke, J., 2011. Problem crocodiles (Crocodylus porosus) in the freshwater, Katherine River, Northern Territory, Australia. Australian Zoologist, 35(3).	2011	Australia	Management (inc Population Management)												1
Lima, D.S., Marmontel, M., Bernard, E., 2014a. Conflicts between humans and giant otters (Pteronura brasiliensis) in Amanã reserve, Brazilian Amazonia. Ambiente and Sociedade, 17(2), 127-142. DOI: 10.1590/S1414-753X2014000200009.	2014	Brazil	Economic, Livelihood and Competition																							1
Loch, C., Marmontel, M., Simoes-Lopes, P.C., 2009. Conflicts with fisheries and intentional killing of freshwater dolphins (Cetacea: Odontoceti) in the western Brazilian Amazon. Biodiversity and Conservation, 18(14), 3979-3988. DOI: 10.1007/s10531-009-9693-4.	2009	Brazil	Entanglement																			1	1
Mansur, E.F., Smith, B.D., Mowgli, R.M. and Diyan, M.A.A., 2008. Two incidents of fishing gear entanglement of Ganges River dolphins (Platanista gangetica gangetica) in waterways of the Sundarbans mangrove forest, Bangladesh. Aquatic Mammals, 34(3), p.362.	2008	Bangladesh	Entanglement																		1
Marchand, G., 2016. Analyse de la dimension spatiale des conflits homme/faune sauvage dans la réserve de développement durable de la rivière Uatumã (Amazonas, Brésil). Cybergeo: European Journal of Geography.	2016	Brazil	Economic, Livelihood and Competition																							1
Martin, A.R., da Silva, V.M.F. and Salmon, D.L., 2004. Riverine habitat preferences of botos (Inia geoffrensis) and tucuxis (Sotalia fluviatilis) in the central Amazon. Marine Mammal Science, 20(2), pp.189-200, DOI: 10.1111/j.1748-7692.2004.tb01150.x.	2004	Brazil	Economic, Livelihood and Competition																			1
Mazingi, D., Mbanje, C., Muguti, G.I. and Chitiyo, S.T., 2019. A Case Report of a Bite From the Nile Crocodile (Crocodylus niloticus) Managed with Regional Anesthesia. Wilderness & environmental medicine, 30(4), pp.441-445, DOI: 10.1016/j.wem.2019.06.013.	2019	Zimbabwe	Attacks														1
Mazzotti, F.J., Brandt, L.A., Moler, P. and Cherkiss, M.S., 2007. American crocodile (Crocodylus acutus) in Florida: recommendations for endangered species recovery and ecosystem restoration. Journal of Herpetology, 41(1), pp.122-132, DOI: 10.1670/0022-1511(2007)41[122:ACCAIF]2.0.CO;2.	2007	USA	Management (inc Population Management)										1
McGregor, J., 2005. Crocodile crimes: people versus wildlife and the politics of postcolonial conservation on Lake Kariba, Zimbabwe. Geoforum, 36(3), 353-369. DOI: 10.1016/j.geoforum.2004.06.007.	2005	Zimbabwe	Attacks and Economics														1
McGuire, T.L., 2010. Ecology and conservation status of tucuxi (Sotalia fluviatilis) in the Pacaya-Samiria Reserve, Peru. Latin American Journal of Aquatic Mammals, pp.103-110, DOI: 10.5597/lajam00158.	2010	Peru	Economic, Livelihood and Competition																				1
Mei, Z., Han, Y., Dong, L., Turvey, S.T., Hao, Y., Wang, K. and Wang, D., 2019. The impact of fisheries management practices on the survival of the Yangtze finless porpoise in China. Aquatic Conservation: Marine and Freshwater Ecosystems, 29(4), pp.639-646, DOI: 10.1002/aqc.3078.	2019	China	Entanglement																						1
Mekisic, A.P. and Wardill, J.R., 1992. Crocodile attacks in the Northern Territory of Australia. Medical journal of Australia, 157(11), pp.751-754.	1992	Australia	Attacks												1
Melisch, R., Asmoro, P.B. and Kusumawardhani, L., 1994. Major steps taken towards otter conservation in Indonesia. International Union for the Conservation of Nature, Otter Specialist Group Bulletin, 10, pp.21-24.	1994	Indonesia	Economic, Livelihood and Competition																										1	1
Mgomo, W. and Reed-Smith, J., 2020. An Assessment of Human Attitudes towards Otters in Mbinga District, Tanzania. IUCN Otter Spec. Group Bull, 37(2), pp.81-97.	2020	Tanzania	Perceptions																													1	1
Michalski, F., Conceição, P.C., Amador, J.A., Laufer, J., Norris, D. 2012. Local perceptions and implications for giant otter (Pteronura brasiliensis) conservation around protected areas in the eastern Brazilian Amazon. IUCN Otter Specialist Group Bulletin, 29(1), 34-45.	2012	Brazil	Economic, Livelihood and Competition																							1
Mintzer, V.J., Martin, A.R., Da Silva, V.M.F., Barbour, A.B., Lorenzen, K., Frazer, T.K., 2013. Effect of illegal harvest on apparent survival of Amazon river dolphins (Inia geoffrensis). Biological Conservation, 158, 280-286. DOI: 10.1016/j.biocon.2012.10.006.	2013	Brazil	Entanglement																			1
Mintzer, V.J., Schmink, M., Lorenzen, K., Frazer, T.K., Martin, A.R., Da Silva, V.M., 2015. Attitudes and behaviors toward Amazon River dolphins (Inia geoffrensis) in a sustainable use protected area. Biodiversity and Conservation, 24(2), pp.247-269. DOI: 10.1007/s10531-014-0805-4.	2015	Brazil	Entanglement																			1
Morales-Betancourt, D. and Medina Barrios, O.D., 2018. Notes on Neotropical Otter (Lontra longicaudis) hunting, a possible underestimated threat in Colombia. IUCN Otter Spec. Group Bull, 35(4), pp.196-202.	2018	Colombia	Economic, Livelihood and Competition
Mosquera-Guerra, F., Trujillo, F., Aya-Cuero, C., Franco-León, N., Valencia, K., Vasquez, A., Duran Prieto, C., Morales-Mejia, D.J., Pachón-Bejarano, G.A., Mantilla-Meluk, H. and Armenteras-Pascual, D., 2020. Population estimate and identification of major conservation threats for the river dolphin (Inia geoffrensis humboldtiana) at the Colombian Orinoquia. Therya, 11(1), pp.9-21.	2020	Colombia	Entanglement																			1
Murillo, L.P.P. and Cambronero, E.M., 2020. Analysis of the Interactions Between Humans and Crocodiles in Costa Rica. South American Journal of Herpetology, 16(1), pp.26-33, DOI: 10.2994/SAJH-D-18-00076.1.	2020	Costa Rica	Attacks						1				1
Musiwa, A.R. and Mhlanga, W., 2020. Human–wildlife conflict in Mhokwe Ward, Mbire District, North‐East Zimbabwe. African Journal of Ecology, DOI: 10.1111/aje.12774.	2020	Zimbabwe	Economic, Livelihood and Competition														1
Nichols, T., Letnic, M., 2008. Problem crocodiles: reducing the risk of attacks by Crocodylus porosus in Darwin Harbour, Northern Territory, Australia. Urban Herpetology: Herpetologial Conservation, 3.	2008	Australia	Attacks												1
Padilla, S.E. and Perera-Trejo, E., 2010. Notes on the perceptions of the Morelet's Crocodile among Mayan communities adjacent to Los Petenes Biosphere Reserve. Revista Latinoamericana de Conservación, 1(2), pp.83-90.	2010	Colombia	Perceptions											1
Patro, S., Padhi, S.K., 2019. Saltwater crocodile and human conflict around Bhitarkanika National Park, India: a raising concern for determining conservation limits. Ocean & Coastal Management, 182, p.104923. DOI: 10.1016/j.ocecoaman.2019.104923.	2019	India	Management (inc Population Management)												1
Paudel, S., Koprowski, J.L. and Cove, M.V., 2020. Seasonal flow dynamics exacerbate overlap between artisanal fisheries and imperiled Ganges River dolphins. Scientific Reports, 10(1), pp.1-12, DOI: 10.1038/s41598-020-75997-4.	2020	Nepal	Entanglement																		1
Paudel, S., Levesque, J.C., Saavedra, C., Pita, C. and Pal, P., 2016. Characterization of the artisanal fishing communities in Nepal and potential implications for the conservation and management of Ganges River Dolphin (Platanista gangetica gangetica). PeerJ, 4, p.e1563, DOI: 10.7717/peerj.1563.	2016	Nepal	Perceptions																		1
Peres, C.A. and Carkeek, A.M., 1993. How caimans protect fish stocks in western Brazilian Amazonia-a case for maintaining the ban on caiman hunting. Oryx, 27(4), pp.225-230.	1993	Brazil	Attacks and Economics					1	1
Platt, S.G. and Thorbjarnarson, J.B., 2000. Population status and conservation of Morelet's crocodile, Crocodylus moreletii, in northern Belize. Biological Conservation, 96(1), pp.21-29.	2000	Belize	Entanglement											1
Platt, S.G., Thorbjarnarson, J.B., 2000. Status and conservation of the American crocodile, Crocodylus acutus, in Belize. Biological Conservation, 96(1), pp.13-20. DOI: 10.1016/S0006-3207(00)00038-0.	2000	Belize	Entanglement										1
Pooley, S., 2015. Using predator attack data to save lives, human and crocodilian. Oryx, 49(4), pp.581-583, DOI: 10.1017/S0030605315000186, DOI: 10.1017/S0030605315000186.	2015	Multiple Countries	Attacks														1
Pooley, S., 2016a. The entangled relations of humans and Nile crocodiles in Africa, c. 1840-1992. Environment and History, 22(3), pp.421-454, DOI: 10.3197/096734016X14661540219357, DOI: 10.3197/096734016X14661540219357.	2016	Multiple Countries	Economic, Livelihood and Competition														1
Pooley, S., 2016b. A cultural herpetology of Nile crocodiles in Africa. Conservation and Society, 14(4), pp.391-405.	2016	Multiple Countries	Perceptions		1												1
Pooley, S., Botha, H., Combrink, X. and Powell, G., 2020. Synthesizing Nile crocodile Crocodylus niloticus attack data and historical context to inform mitigation efforts in South Africa and eSwatini (Swaziland). Oryx, 54(5), pp.629-638, DOI: 10.1017/S0030605318001102.	2020	Multiple Countries	Attacks				1										1
Pooley, S., Botha, H., Combrink, X., Powell, G., 2020. Synthesizing Nile crocodile Crocodylus niloticus attack data and historical context to inform mitigation efforts in South Africa and eSwatini (Swaziland). Oryx, 54(5), pp.629-638. DOI: 10.1017/S0030605318001102.	2020	Multiple Countries	Attacks														1
Pozo, R.A., LeFlore, E.G., Duthie, A.B., Bunnefeld, N., Jones, I.L., Minderman, J., Rakotonarivo, O.S. and Cusack, J.J., 2021. A multispecies assessment of wildlife impacts on local community livelihoods. Conservation Biology, 35(1), pp.297-306, DOI: 10.1111/cobi.13565.	2020	Botswana	Economic, Livelihood and Competition														1
Ramírez-Bravo, O.E., Does local knowledge change after a species long term absence? The case of giant river otters Pteronura brasiliensis Gmelin, 1788 (Carnivora Mustelidae).	2016	Peru	Perceptions																							1
Recharte, M., Bowler, M., Bodmer, R., 2009. Potential conflict between fishermen and giant otter (Pteronura brasiliensis) populations by fishermen in response to declining stocks of arowana fish (Osteoglossum bicirrhosum) in northeastern Peru. IUCN Otter Specialist Group Bulletin, 25(2), 89-93.	2009	Peru	Economic, Livelihood and Competition																							1
Recharte, M., Bride, I.G. and Bowler, M., 2015. A recovering flagship: giant otters, communities and tourism in northern Peru. Wildlife Research, 41(6), pp.490-498, DOI: 10.1071/WR14032.	2015	Peru	Economic, Livelihood and Competition																							1
Rheingantz, M.L., Santiago‐Plata, V.M. and Trinca, C.S., 2017. The Neotropical otter Lontra longicaudis: a comprehensive update on the current knowledge and conservation status of this semiaquatic carnivore. Mammal Review, 47(4), pp.291-305, DOI: 10.1111/mam.12098.	2017	Multiple Countries	Economic, Livelihood and Competition																									1
Richardson, J. and Livingstone, D., 1962. An attack by a Nile crocodile on a small boat. Copeia, 1962(1), pp.203-204.	1962	Zimbabwe	Attacks														1
Rosas-Ribeiro, P.F., Rosas, F.C.W., Zuanon, J., 2012. Conflict between giant otter and fishermen Pteronura brasiliensis in western Brazilian Amazon. Biotropica, 44(3), 437-444. DOI: 10.1111/j.1744-7429.2011.00828.x.	2012	Brazil	Economic, Livelihood and Competition																							1
Rose, A., Fukuda, Y., Campbell, H.A., 2020. Using environmental DNA to detect estuarine crocodiles, a cryptic-ambush predator of humans. Human–Wildlife Interactions, 14(1), p.11. DOI: 10.5061/dryad.jwstqjq5p.	2020	Australia	Management (inc Population Management)												1
Sandoval-Hernández, I., Duran-Apuy, A. and Quirós-Valerio, J., 2017. Activities That May Influence the Risk of Crocodile (Crocodylus Acutus: Reptilia: Crocodilidae) Attack to Humans in the Tempisque River Area, Guanacaste, Costa Rica. Uniciencia, 31(1), pp.13-22.	2017	Costa Rica	Attacks										1
Santiapillai, C. and de Silva, M., 2001. Status, distribution and conservation of crocodiles in Sri Lanka. Biological Conservation, 97(3), pp.305-318, DOI: 10.1016/S0006-3207(00)00126-9.	2001	Sri Lanka	Economic, Livelihood and Competition												1			1
Scott, R., Scott, H., 1994. Crocodile bites and traditional beliefs in Korogwe District, Tanzania. British Medical Journal, 309, 1691-1692. DOI: 10.1136/bmj.309.6970.1691.	1994	Tanzania	Attacks														1
Sideleau, B., Sitorus, T., Suryana, D. and Britton, A., 2021. Saltwater crocodile (Crocodylus porosus) attacks in East Nusa Tenggara, Indonesia. Marine and Freshwater Research, DOI: 10.1071/MF20237.	2017	Timor Leste	Attacks												1
Silva, V.M. and Best, R.C., 1996. Freshwater dolphin/fisheries interaction in the Central Amazon (Brazil). Amazoniana: Limnologia et Oecologia Regionalis Systematis Fluminis Amazonas, 14(1/2), pp.165-175.	1996	Brazil	Entanglement																			1
Singha, T.P., Dutta, B.K. and Biswas, S.P., 2013. The status of the Ganges river dolphin Platanista gangetica gangetica in the river Barak, Assam, India. Journal of the Bombay Natural History Society (JBNHS), 110(2), pp.129-134.	2013	India	Entanglement																		1
Sinha, R.K., 2002. An alternative to dolphin oil as a fish attractant in the Ganges river system: conservation of the Ganges river dolphin. Biological Conservation, 107(2), 253-257. DOI: 10.1016/S0006-3207(02)00058-7.	2002	Multiple Countries	Entanglement																		1
Sinton, T.J. and Byard, R.W., 2016. Pathological features of fatal crocodile attacks in northern Australia, 2005–2014. Journal of forensic sciences, 61(6), pp.1553-1555, DOI: 10.1111/1556-4029.13171.	2016	Australia	Attacks												1
Smith, A.M. and Smith, B.D., 1998. Review of status and threats to river cetaceans and recommendations for their conservation. Environmental Reviews, 6(3-4), pp.189-206.	1998	Global	Entanglement																		1	1		1
Smithem, J.L. and Mazzotti, F.J., 2008. Risk perception and acceptance of the American crocodile (Crocodylus Acutus) in South Florida. Florida Scientist, pp.9-22.	2008	USA	Perceptions										1
Somaweera, R., 2011. A report of a probable unprovoked attack by an Australian freshwater crocodile at Lake Argyle in Western Australia. Australian Zoologist, 35(4), pp.973-976.	2011	Australia	Attacks													1
Than, K.Z., Zaw, Z. and Hughes, A.C., Integrating local perspectives into conservation could facilitate human–crocodile coexistence in the Ayeyarwady Delta, Myanmar. Oryx, pp.1-9, DOI: 10.1017/S003060532000037X.	2020	Myanmar	Perceptions												1
Turvey, S.T., Pitman, R.L., Taylor, B.L., Barlow, J., Akamatsu, T., Barrett, L.A., Zhao, X., Reeves, R.R., Stewart, B.S., Wang, K., Wei, Z., Zhang, X., Pusser, L.T., Richlen, M., Brandon, J.R., Wang, D., 2007. First human-caused extinction of a cetacean species? Biology Letters, 3(5), 537-540. DOI: 10.1098/rsbl.2007.0292.	2007	China	Entanglement																					1
Turvey, S.T., Risley, C.L., Moore, J.E., Barrett, L.A., Yujiang, H., Xiujiang, Z., Kaiya, Z. and Ding, W., 2013. Can local ecological knowledge be used to assess status and extinction drivers in a threatened freshwater cetacean?. Biological Conservation, 157, pp.352-360, DOI: 10.1016/j.biocon.2012.07.016.	2013	China	Entanglement																						1
Uluwaduge, P., Menike, K.E., Senevirathna, E.M.T.K. and Pathirana, G.C.L., 2018. Mitigating the Human-Crocodile Conflict in Sri Lanka: A Study Based on the Nilwala River Area in Matara District. Procedia engineering, 212, pp.994-1001, DOI: 10.1016/j.proeng.2018.01.128.	2018	Sri Lanka	Attacks												1
Vyas, R. and Stevenson, C., 2017. Review and analysis of human and Mugger Crocodile conflict in Gujarat, India from 1960 to 2013. Journal of Threatened Taxa, 9(12), pp.11016-11024, DOI: 10.11609/jott.3790.9.12.11016-11024.	2017	India	Attacks															1
Vyas, R., 2010. Mugger (Crocodylus palustris) population in and around Vadodara city, Gujarat state, India. Russian Journal of herpetology, 17(1), pp.43-50.	2010	India	Attacks															1
Wakid, A., 2009. Status and distribution of the endangered Gangetic dolphin (Platanista gangetica gangetica) in the Brahmaputra River within India in 2005. Current Science, pp.1143-1151.	2009	India	Entanglement																		1
Walsh, B. and Whitehead, P.J., 1993. Problem crocodiles, Crocodylus porosus, at Nhulunbuy, Northern Territory: an assessment of relocation as a mangaement strategy. Wildlife Research, 20(1), pp.127-135.	1993	Australia	Management (inc Population Management)												1
Whitaker, R., 2007. The Gharial: going extinct again. Iguana, 14(1), pp.25-32.	2007	India	Entanglement																1
Woodward, A.R., Leone, E.H., Dutton, H.J., Waller, J.E. and Hord, L., 2019. Characteristics of American alligator bites on people in Florida. The Journal of Wildlife Management, 83(6), pp.1437-1453, DOI: 10.1002/jwmg.21719.	2019	USA	Attacks				1
Zappes, C.A., de Sá Alves, L.C.P., da Silva, C.V., de Freitas Azevedo, A., Di Beneditto, A.P.M. and Andriolo, A., 2013. Accidents between artisanal fisheries and cetaceans on the Brazilian coast and Central Amazon: Proposals for integrated management. Ocean & coastal management, 85, pp.46-57, DOI: 10.1016/j.ocecoaman.2013.09.004.	2013	Brazil	Perceptions																			1
Zhang, X., Wang, D., Liu, R., Wei, Z., Hua, Y., Wang, Y., Chen, Z., Wang, L., 2003. The Yangtze river dolphin or baiji (Lipotes vexillifer): population status and conservation issues in the Yangtze river, China. Aquatic Conservation: Marine and Freshwater Ecosystems, 13(1), 51-64. DOI: 10.1002/aqc.547.	2003	China	Entanglement																						1
				1	2	1	6	5	6	1	1	2	5	2	33	2	14	5	1	4	14	14	6	4	4	11	1	7	2	6	2	6	5

## Sheet: Species Data
Category	Species	Scientific Name	Name	IUCN Status (IUCN, 2019)	Number of Studies	Conflict Documentation (CFD= Conflict Well Documented; CID= Conflict Poorly Documented, CRD= CRDearch Required)	Conflict Severity	Body Mass Original kg (Macdonald, 2009; Hunter, 2011; Lakin et al., 2020)	Mean Body Mass kg	Body Mass Category kg	Fatal Attacks (Sideleau and Britton, 2013)	Non-Fatal Attacks (Belanger et al., 2011; Sideleau and Britton, 2013)	All attacks (Belanger et al., 2011; Sideleau and Britton, 2013)	Notes
Otter	African Clawless Otter	Aonyx capensis	African Clawless Otter (Aonyx capensis)	NT	5	CFD	Low	10-21	15.5	10-49	0	0	0
Crocodilia	African Dwarf Crocodile	Osteolaemus tetraspis	African Dwarf Crocodile (Osteolaemus tetraspis)	VU	1	CRD	Low	18.8	18.8	10-49	0	0	0
Cetacean	Amazon River Dolphin	Inia geoffrensis	Amazon River Dolphin (Inia geoffrensis)	EN	14	CFD	Low	85-130	107.5	≥50	0	0	0
Crocodilia	American Alligator	Alligator mississippiensis	American Alligator (Alligator mississippiensis)	LC	6	CFD	High	78.85	78.85	≥50	0	47	47
Crocodilia	American Crocodile	Crocodylus acutus	American Crocodile (Crocodylus acutus)	VU	5	CFD	Severe	76.7	76.7	≥50	13	56	69	Note: only tropical/subtropical parts of range included, not USA.
Otter	Asian Small-clawed Otter	Aonyx cinereus	Asian Small-clawed Otter (Aonyx cinereus)	VU	2	CID	Low	2.4-3.8	3.1	≤10	0	0	0
Crocodilia	Australian Freshwater Crocodile	Crocodylus johnstoni	Australian Freshwater Crocodile (Crocodylus johnstoni)	LC	2	CID	Moderate	19.2	19.2	10-49	0	6	6
Cetacean	Baiji	Lipotes vexillifer	Baiji (Lipotes vexillifer)	CR	4	CID	Low	135-230	182.5	≥50	0	0	0
Crocodilia	Black Caiman	Melanosuchus niger	Black Caiman (Melanosuchus niger)	LC	5	CFD	High	69	69	≥50	9	27	36
Crocodilia	Broud-snouted Caiman	Caiman latirostris	Broud-snouted Caiman (Caiman latirostris)	LC	1	CRD	Moderate	15.55	15.55	10-49	0	2	2
Crocodilia	Central African Slender-snouted Crocodile	Mecistops leptorhynchus	Central African Slender-snouted Crocodile (Mecistops leptorhynchus)	Not assessed	0	Data Deficient	Data Deficient	NA	NA	NA	0	0	0
Crocodilia	Chinese Alligator	Alligator sinensis	Chinese Alligator (Alligator sinensis)	CR	0	Data Deficient	Data Deficient	18.3333	18.3333	10-49	0	0	0
Otter	Congo Clawless Otter	Aonyx congicus	Congo Clawless Otter (Aonyx congicus)	NT	2	CID	Low	14-25	19.5	10-49	0	0	0
Crocodilia	Cuban Crocodile	Crocodylus rhombifer	Cuban Crocodile (Crocodylus rhombifer)	CR	0	Data Deficient	Data Deficient	103.425	103.425	≥50	0	0	0
Crocodilia	Dwarf Caiman	Paleosuchus palpebrosus	Dwarf Caiman (Paleosuchus palpebrosus)	LC	0	Data Deficient	Data Deficient	7.3	7.3	≤10	0	0	0
Otter	Eurasian Otter	Lutra lutra	Eurasian Otter (Lutra lutra)	NT	0	Data Deficient	Data Deficient	6-17	11.5	10-49	0	0	0	Note: only certain parts of range in subtropical region. Studies mainly from Europe where better studied.
Crocodilia	False Gharial	Tomistoma schlegelii	False Gharial (Tomistoma schlegelii)	VU	0	Data Deficient	High	119	119	≥50	2	6	8
Crocodilia	Gharial	Gavialis gangeticus	Gharial (Gavialis gangeticus)	CR	1	CRD	Low	147	147	≥50	0	0	0
Otter	Giant Otter	Pteronura brasiliensis	Giant Otter (Pteronura brasiliensis)	EN	11	CFD	Low	22-34	28	10-49	0	0	0
Otter	Hairy-nosed Otter	Lutra sumatrana	Hairy-nosed Otter (Lutra sumatrana)	EN	0	Data Deficient	Data Deficient	5-8	6.5	≤10	0	0	0
Crocodilia	Hall's New Guinea crocodile	Crocodylus halli	Hall's New Guinea crocodile (Crocodylus halli)	Not assessed	0	Data Deficient	Data Deficient	NA	NA	NA	0	0	0
Cetacean	Irrawaddy Dolphin	Orcaella brevirostris	Irrawaddy Dolphin (Orcaella brevirostris)	EN	4	CID	Low	100	100	≥50	0	0	0	Note: also uses marine habitat in some areas.
Crocodilia	Morelet's Crocodile	Crocodylus moreletii	Morelet's Crocodile (Crocodylus moreletii)	LC	2	CID	High	31.7	31.7	10-49	2	14	16
Crocodilia	Mugger	Crocodylus palustris	Mugger (Crocodylus palustris)	VU	5	CFD	Severe	53.875	53.875	≥50	50	48	98
Otter	Neotropical River Otter	Lontra longicaudis	Neotropical River Otter (Lontra longicaudis)	NT	7	CFD	Low	5-12	8.5	≤10	0	0	0
Crocodilia	New Guinea Crocodile	Crocodylus novaeguineae	New Guinea Crocodile (Crocodylus novaeguineae)	LC	0	Data Deficient	Data Deficient	39.9	39.9	10-49	0	0	0
Crocodilia	Nile Crocodile	Crocodylus niloticus	Nile Crocodile (Crocodylus niloticus)	LC	14	CFD	Severe	94.2	94.2	≥50	309	119	428
Otter	North American River Otter	Lontra canadensis	North American River Otter (Lontra canadensis)	LC	1	CRD	Moderate	3.4-15.5	9.45	10-49	0	7	0	Note: otter time period 2000-2009 from Beralanger et al., 2011. Only Florida and California included for number of attacks.
Crocodilia	Orinoco Crocodile	Crocodylus intermedius	Orinoco Crocodile (Crocodylus intermedius)	CR	0	Data Deficient	Moderate	107.9	107.9	≥50	0	1	1
Crocodilia	Philippine Crocodile	Crocodylus mindorensis	Philippine Crocodile (Crocodylus mindorensis)	CR	0	Data Deficient	Moderate	36.9	36.9	10-49	0	2	2	Note: also know as C. johnsoni.
Crocodilia	Saltwater Crocodile	Crocodylus porosus	Saltwater Crocodile (Crocodylus porosus)	LC	33	CFD	Severe	78.8	78.8	≥50	285	210	495
Crocodilia	Siamese Crocodile	Crocodylus siamensis	Siamese Crocodile (Crocodylus siamensis)	CR	0	Data Deficient	Moderate	42.5	42.5	10-49	0	2	2
Crocodilia	Slender-snouted Crocodile	Mecistops cataphractus	Slender-snouted Crocodile (Mecistops cataphractus)	CR	1	CRD	Low	50.5	50.5	≥50	0	0	0
Otter	Smooth-coated Otter	Lutrogale perspicillata	Smooth-coated Otter (Lutrogale perspicillata)	VU	6	CFD	Low	7-11	9	≤10	0	0	0
Crocodilia	Smooth-fronted Caiman	Paleosuchus trigonatus	Smooth-fronted Caiman (Paleosuchus trigonatus)	LC	2	CID	Low	7.5	7.5	≤10	0	0	0
Cetacean	South Asian River Dophin	Platanista gangetica	South Asian River Dophin (Platanista gangetica)	EN	14	CFD	Low	80-90	85	≥50	0	0	0	Note: includes two susbspecies - Ganges and Indus river dolphin.
Crocodilia	Spectacled Caiman	Caiman crocodilus	Spectacled Caiman (Caiman crocodilus)	LC	6	CFD	High	12.9444	12.9444	10-49	0	15	15
Otter	Spotted-necked Otter	Hydrictis maculicollis	Spotted-necked Otter (Hydrictis maculicollis)	NT	6	CFD	Low	3.5-6	4.75	≤10	0	0	0	Note: still debate as to whether there are three species, including Bolivian and Araguian river dolphin.
Cetacean	Tucuxi	Sotalia fluviatilis	Tucuxi (Sotalia fluviatilis)	EN	6	CFD	Low	36-45	40.5	10-49	0	0	0	Note: also uses marine habitat in some areas.
Crocodilia	West African Crocodile	Crocodylus suchus	West African Crocodile (Crocodylus suchus)	Not assessed	2	CID	Low	NA	NA	NA	0	0	0	Classed as data deficenint. Know to attack people but not docuemnted in Sideleau and Britton (2013)
Crocodilia	Yacaré	Caiman yacare	Yacaré (Caiman yacare)	LC	1	CRD	Moderate	13.58	13.58	10-49	0	5	5
Cetacean	Yangtze Finless Porpoise	Neophocaena asiaeorientalis ssp. asiaeorientalis	Yangtze Finless Porpoise (Neophocaena asiaeorientalis ssp. asiaeorientalis)	CR	4	CID	Low	30-80	55	≥50	0	0	0	Note: includes two subspecies - Yangtze finless porpoise and East Asian finless porpoise.

## Sheet: Jurua Interviews
ID	Interviewer	Community	Interviewee Number	Age	Species	Causes problems	Problem Ranking	Damages equipment	Entangled in Net	What happens when found entangled	Frighten Fish	Leaves areas to fish	Hunted in community	Hunted in 2013/2014	Hunted in Life	Can coexist with species
1	JEH	Boca de Xerua	Interviewee 1	57	Giant Otter	Yes	3	No	No		Yes	No	No		No	Yes
2	JEH	Boca de Xerua	Interviewee 1	57	Boto	Yes	2	Yes	Yes	Released	No	Yes	No		No	Yes
3	JEH	Boca de Xerua	Interviewee 1	57	Black Caiman	Yes	1	Yes	No		Yes	No				Yes
4	JEH	Boca de Xerua	Interviewee 1	57	Tucuxi	No		No	No		No	No	No		No	Yes
5	JEH	Sao Sebastiao	Interviewee 2	48, 49	Giant Otter	No		No	No		Yes	No	No			Yes
6	JEH	Sao Sebastiao	Interviewee 2	48, 49	Boto	Yes	2	Yes	No		Yes	No	No			Yes
7	JEH	Sao Sebastiao	Interviewee 2	48, 49	Black Caiman	Yes	1	Yes	Yes	Killed	Yes	No	No			Yes
8	JEH	Sao Sebastiao	Interviewee 2	48, 49	Tucuxi	No		No	No		Yes	No	No			Yes
9	JEH	Xibauazinho	Interviewee 3	32	Giant Otter	Yes	3	No	No		Yes	No	No			No
10	JEH	Xibauazinho	Interviewee 3	32	Boto	Yes	2	Yes	Yes	Released	No	No	No			No
11	JEH	Xibauazinho	Interviewee 3	32	Black Caiman	Yes	1	Yes	Yes	Died	Yes	No	No			No
12	JEH	Xibauazinho	Interviewee 3	32	Tucuxi	No		No	Yes	Released	No	No	No			No
13	JEH	Xibauazinho	Interviewee 4	32	Giant Otter	Yes	3	No	Yes	Died	Yes	Yes	Yes	No		Yes
14	JEH	Xibauazinho	Interviewee 4	32	Boto	Yes	2	Yes	No		Yes	No	No	No		Yes
15	JEH	Xibauazinho	Interviewee 4	32	Black Caiman	Yes	1	Yes	Yes	Killed	Yes	No	Yes	Yes	Yes	Yes
16	JEH	Xibauazinho	Interviewee 4	32	Tucuxi	No		No	No		No		No	No		Yes
17	JEH	Sao Jose	Interviewee 5	64, 24	Giant Otter	Yes	3	No	No	Escaped	Yes	No	No	No	No	Yes
18	JEH	Sao Jose	Interviewee 5	64, 24	Boto	Yes	1	Yes	No	Escaped	Yes	Yes	No	No	No	Yes
19	JEH	Sao Jose	Interviewee 5	64, 24	Black Caiman	Yes	2	Yes	No	Escaped	Yes	Yes	Yes	Yes	Yes	Yes
20	JEH	Sao Jose	Interviewee 5	64, 24	Tucuxi	Yes	4	Yes	No	Escaped	Yes	No	No	No	No	Yes
21	JEH	Sao Jose	Interviewee 6	60	Giant Otter	No		No	No		Yes	No	No	No	No	Yes
22	JEH	Sao Jose	Interviewee 6	60	Boto	Yes	2	Yes	No		No	No	No	No	No	Yes
23	JEH	Sao Jose	Interviewee 6	60	Black Caiman	Yes	1	Yes	No		No	No	No	No	No	Yes
24	JEH	Sao Jose	Interviewee 6	60	Tucuxi	No		No	No		No	No	No	No	No	Yes
25	JEH	Sao Jose	Interviewee 7	19	Giant Otter	Yes	2	Yes	No		Yes	No	Yes	No	No	No
26	JEH	Sao Jose	Interviewee 7	19	Boto	Yes	1	Yes	Yes	Died	Yes	No	Yes	No	No	No
27	JEH	Sao Jose	Interviewee 7	19	Black Caiman	Yes	3	Yes	Yes	Killed	Yes	No	No	No	No	No
28	JEH	Sao Jose	Interviewee 7	19	Tucuxi	Yes	4	Yes	No		Yes	No	Yes	No	No	No
29	JEH	Monte Carmelo	Interviewee 8	40	Giant Otter	Yes	3	Yes	No		Yes	Yes	Yes	Yes	Yes	Yes
30	JEH	Monte Carmelo	Interviewee 8	40	Boto	Yes	2	Yes	Yes	Released	Yes	No	Yes	Yes	Yes	Yes
31	JEH	Monte Carmelo	Interviewee 8	40	Black Caiman	Yes	1	Yes	Yes		Yes	No	Yes	Yes	Yes	Yes
32	JEH	Monte Carmelo	Interviewee 8	40	Tucuxi	No		No	No		Yes	No	No	No	No	Yes
33	JEH	Boa Vista	Interviewee 9	54	Giant Otter	Yes	2	Yes	No		Yes	Yes	Yes	No	Yes	Yes
34	JEH	Boa Vista	Interviewee 9	54	Boto	Yes	3	Yes	Yes	Released	Yes	Yes	No	No	Yes	Yes
35	JEH	Boa Vista	Interviewee 9	54	Black Caiman	Yes	1	Yes	Yes	Killed	Yes	No	Yes	Yes	Yes	Yes
36	JEH	Boa Vista	Interviewee 9	54	Tucuxi	No		No	No		No	No	No	No	No	Yes
37	JEH	Bonfim	Interviewee 10	58	Giant Otter	Yes	2	No	Yes	Died	Yes	No	No	No	No	Yes
38	JEH	Bonfim	Interviewee 10	58	Boto	Yes	3	Yes	Yes	Died	Yes	No	No	No	No	Yes
39	JEH	Bonfim	Interviewee 10	58	Black Caiman	Yes	1	Yes	Yes	Killed	Yes	No	No	No	No	Yes
40	JEH	Bonfim	Interviewee 10	58	Tucuxi	No		No	No		Yes	No	No	No	No	Yes
41	JEH	Mandioca	Interviewee 11	59	Giant Otter	Yes	3	No	Yes	Died	Yes	No	No	No	No	Yes
42	JEH	Mandioca	Interviewee 11	59	Boto	Yes	2	Yes	Yes	Released	No	No	No	No	No	Yes
43	JEH	Mandioca	Interviewee 11	59	Black Caiman	Yes	1	Yes	Yes	Killed	Yes	Yes	Yes	No	No	Yes
44	JEH	Mandioca	Interviewee 11	59	Tucuxi	No		No	No		No	No	No	No	No	Yes
45	JEH	Cachoeira	Interviewee 12	35, 49, 24	Giant Otter	Yes	1	No	Yes	Escaped	Yes	No	No	No	Yes	Yes
46	JEH	Cachoeira	Interviewee 12	35, 49, 24	Boto	Yes	2	Yes	Yes	Released	No	No	No	No	No	Yes
47	JEH	Cachoeira	Interviewee 12	35, 49, 24	Black Caiman	Yes	3	Yes	Yes	Killed	No	No	No	No	Yes	Yes
48	JEH	Cachoeira	Interviewee 12	35, 49, 24	Tucuxi	No		No	Yes	Released	No	No	No	No	No	Yes
49	JEH	Sao Francisco	Interviewee 13	43	Giant Otter	No		Yes	No		Yes	No	No	No	No	Yes
50	JEH	Sao Francisco	Interviewee 13	43	Boto	Yes	2	Yes	Yes	Released	Yes	No	No	No	No	Yes
51	JEH	Sao Francisco	Interviewee 13	43	Black Caiman	Yes	1	Yes	Yes	Killed	Yes	No	Yes	Yes	Yes	Yes
52	JEH	Sao Francisco	Interviewee 13	43	Tucuxi	No		No	Yes	Released	No	No	No	No	No	Yes
53	JEH	Santo Antonio	Interviewee 14	42, 34	Giant Otter	Yes	2	Yes	No	Escaped	Yes	Yes	No	No	No	Yes
54	JEH	Santo Antonio	Interviewee 14	42, 34	Boto	Yes	3	Yes	Yes	Released	Yes	No	No	No	No	Yes
55	JEH	Santo Antonio	Interviewee 14	42, 34	Black Caiman	Yes	1	Yes	Yes	Killed	Yes	No	Yes	Yes	Yes	Yes
56	JEH	Santo Antonio	Interviewee 14	42, 34	Tucuxi	No		No	Yes	Released	No	No	No	No	No	Yes
57	JEH	Morada Nova	Interviewee 15		Giant Otter	Yes	2	Yes	No		Yes	Yes	No	No	No	Yes
58	JEH	Morada Nova	Interviewee 15		Boto	Yes	3	Yes	Yes	Released	Yes	No	No	No	No	Yes
59	JEH	Morada Nova	Interviewee 15		Black Caiman	Yes	1	Yes	Yes	Killed	Yes	No	Yes	No	No	Yes
60	JEH	Morada Nova	Interviewee 15		Tucuxi	No		No	No		Yes	No	No	No	No	Yes
61	JEH	Morada Nova	Interviewee 16	47	Giant Otter	Yes	3	No	No		Yes	Yes	No	No	No	Depends
62	JEH	Morada Nova	Interviewee 16	47	Boto	Yes	2	Yes	No		Yes	No	No	No	No	Depends
63	JEH	Morada Nova	Interviewee 16	47	Black Caiman	Yes	1	Yes	Yes	Killed	Yes	No	Yes	No	No	Depends
64	JEH	Morada Nova	Interviewee 16	47	Tucuxi	No		No	No		No	No	No	No	No	Depends
65	JEH	Carocal	Interviewee 17	38, 19, 20, 52	Giant Otter	Yes	2	Yes	No		Yes	No	No	No	No	Depends
66	JEH	Carocal	Interviewee 17	38, 19, 20, 52	Boto	Yes	3	Yes	Yes	Released	Yes	No	No	No	No	Depends
67	JEH	Carocal	Interviewee 17	38, 19, 20, 52	Black Caiman	Yes	1	Yes	Yes	Killed	No	No	No	No	No	Depends
68	JEH	Carocal	Interviewee 17	38, 19, 20, 52	Tucuxi	No		No	No		No	No	No	No	No	Depends
69	JEH	Barreira do Ido	Interviewee 18	55	Giant Otter	Yes	2	Yes	No		Yes	Yes	No	No	Yes	Yes
70	JEH	Barreira do Ido	Interviewee 18	55	Boto	Yes	1	Yes	Yes	Released	Yes	No	Yes	No	No	Yes
71	JEH	Barreira do Ido	Interviewee 18	55	Black Caiman	Yes	2	Yes	Yes	Killed	Yes	Yes	Yes	Yes	Yes	Yes
72	JEH	Barreira do Ido	Interviewee 18	55	Tucuxi	No		No	Yes	Released	No	No	No	No	No	Yes
73	JEH	Remanso	Interviewee 19	59	Giant Otter	Yes	3	Yes	No		Yes	Yes	No	No	No	Yes
74	JEH	Remanso	Interviewee 19	59	Boto	Yes	2	Yes	Yes	Released	Yes	No	No	No	No	Yes
75	JEH	Remanso	Interviewee 19	59	Black Caiman	Yes	1	Yes	Yes	Killed	No	No	Yes	Yes	Yes	Yes
76	JEH	Remanso	Interviewee 19	59	Tucuxi	No		No	Yes	Released	No	No	No	No	No	Yes
77	JEH	Bauana	Interviewee 20		Giant Otter	Yes	2	Yes	No		Yes	Yes	No	No	Yes	Yes
78	JEH	Bauana	Interviewee 20		Boto	Yes	1	Yes	Yes	Killed		No	No	No	Yes	Yes
79	JEH	Bauana	Interviewee 20		Black Caiman	Yes	3	Yes	Yes	Died	No	No	Yes	Yes	Yes	Yes
80	JEH	Bauana	Interviewee 20		Tucuxi	No		No	Yes	Released	No	No	No	No	No	Yes
81	JEH	Bauana	Interviewee 21	49, 26	Giant Otter	Yes	2	Yes	No	Escaped	Yes	Yes	No	No	No	Yes
82	JEH	Bauana	Interviewee 21	49, 26	Boto	Yes	3	Yes	No		Yes	No	No	No	No	Yes
83	JEH	Bauana	Interviewee 21	49, 26	Black Caiman	Yes	1	Yes	No	Killed	Yes	No	No	No	Yes	Yes
84	JEH	Bauana	Interviewee 21	49, 26	Tucuxi	No		No	Yes	Released	No	No	No	No	No	Yes
85	JEH	Bom Jesus	Interviewee 22	34	Giant Otter	Yes	3	Yes	No		Yes	No	No	No	No	Yes
86	JEH	Bom Jesus	Interviewee 22	34	Boto	Yes	1	Yes	Yes	Killed	Yes	No	No	No	No	Yes
87	JEH	Bom Jesus	Interviewee 22	34	Black Caiman	Yes	2	Yes	Yes	Killed	No	No	No	No	No	Yes
88	JEH	Bom Jesus	Interviewee 22	34	Tucuxi	No		No	Yes	Released	Yes	No	No	No	No	Yes
89	JEH	Imperatriz	Interviewee 23	59, 23	Giant Otter	Yes	3	Yes	No	Escaped	Yes	Yes	No	No	Yes	Depends
90	JEH	Imperatriz	Interviewee 23	59, 23	Boto	Yes	1	Yes	Yes	Killed	No	Yes	No	No	Yes	Depends
91	JEH	Imperatriz	Interviewee 23	59, 23	Black Caiman	Yes	2	Yes	Yes	Killed	No	No	No	No	Yes	Depends
92	JEH	Imperatriz	Interviewee 23	59, 23	Tucuxi	No		No	Yes	Killed	No	No	No	No	No	Depends
93	JEH	Novo Horizonte	Interviewee 24	40	Giant Otter	Yes	1	Yes	No		Yes	Yes	No	No	No	Depends
94	JEH	Novo Horizonte	Interviewee 24	40	Boto	Yes	3	Yes	Yes	Released	No	No	No	No	No	Depends
95	JEH	Novo Horizonte	Interviewee 24	40	Black Caiman	Yes	2	Yes	Yes	Killed		No	Yes	No	No	Depends
96	JEH	Novo Horizonte	Interviewee 24	40	Tucuxi	No		No	Yes	Released	No	No	No	No	No	Depends
97	JEH	Nova Esperanca	Interviewee 25	54	Giant Otter	Yes	3	Yes	No		Yes	Yes	No	No	Yes	Depends
98	JEH	Nova Esperanca	Interviewee 25	54	Boto	Yes	2	Yes	No	Escaped	Yes	No	No	No	No	Depends
99	JEH	Nova Esperanca	Interviewee 25	54	Black Caiman	Yes	1	Yes	Yes	Killed	Yes	Yes	No	No	Yes	Depends
100	JEH	Nova Esperanca	Interviewee 25	54	Tucuxi	No		No	No		No	No	No	No	No	Depends
101	JEH	Pupuai	Interviewee 26	42,43,41	Giant Otter	Yes	3	Yes	No		Yes	Yes	No	No	No	Depends
102	JEH	Pupuai	Interviewee 26	42,43,41	Boto	Yes	2	Yes	No		Yes	No	No	No	No	Depends
103	JEH	Pupuai	Interviewee 26	42,43,41	Black Caiman	Yes	1	Yes	Yes	Killed	Yes	No	Yes	Yes	Yes	Depends
104	JEH	Pupuai	Interviewee 26	42,43,41	Tucuxi	No		No	Yes	Released	No	No	No	No	No	Depends
105	JB	Goiabal	Interviewee 27	55	Giant Otter	No	3	No
106	JB	Goiabal	Interviewee 27	55	boto	Yes	2	Yes
107	JB	Goiabal	Interviewee 27	55	Black Caiman	Yes	1	Yes
108	JB	Goiabal	Interviewee 27	55	tucuxi	No		No
109	JB	vista alegre	Interviewee 28	28	Giant Otter	Yes	3	Yes	No		Yes	No	No	No	No	Yes
110	JB	vista alegre	Interviewee 28	28	boto	Yes	1	Yes	Yes	Released	Yes	No	No	No	No	Yes
111	JB	vista alegre	Interviewee 28	28	Black Caiman	Yes	2	Yes	Yes	Killed	No	No	Yes	No	Yes	Yes
112	JB	vista alegre	Interviewee 28	28	tucuxi	No		No	No		No	No	No	No	No	Yes
113	JB	pupunha	Interviewee 29	58	Giant Otter	Yes	3	Yes	Yes	Died	Yes	No	Yes	Yes	Yes	Depends
114	JB	pupunha	Interviewee 29	58	boto	Yes	2	Yes	Yes	Released	Yes	No	No	No	No	Depends
115	JB	pupunha	Interviewee 29	58	Black Caiman	Yes	1	Yes	Yes	Killed	Yes	No	Yes	Yes	Yes	Depends
116	JB	pupunha	Interviewee 29	58	tucuxi	No		No	No		No	No	No	No	No	Depends
117	JB	morro alto	Interviewee 30	46	Giant Otter	Yes	2	Yes	Yes	Died	Yes	No	No	No	No	No
118	JB	morro alto	Interviewee 30	46	boto	Yes	3	Yes	No		Yes	No	No	No	No	No
119	JB	morro alto	Interviewee 30	46	Black Caiman	Yes	1	Yes	Yes	Killed	Yes	Yes	Yes	No	No	No
120	JB	morro alto	Interviewee 30	46	tucuxi	No		No	No		No	No	No	No	No	Yes
121	JB	Bacaba	Interviewee 31	64	Giant Otter	Yes	1	Yes	Yes	Died	Yes	No	No	No	No	No
122	JB	Bacaba	Interviewee 31	64	boto	Yes	3	Yes	Yes	Released	Yes	No	No	No	No	No
123	JB	Bacaba	Interviewee 31	64	Black Caiman	Yes	2	Yes	Yes	Killed	Yes	No	Yes	No	No	No
124	JB	Bacaba	Interviewee 31	64	tucuxi	No		No	No		No	No	No	No	No	No
125	JB	sao jose anaxiqui	Interviewee 32	39	Giant Otter	Yes	1	No	No		Yes	Yes	No	No	No	No
126	JB	sao jose anaxiqui	Interviewee 32	39	boto	Yes	3	Yes	Yes	Released	Yes	Yes	No	No	No	Yes
127	JB	sao jose anaxiqui	Interviewee 32	39	Black Caiman	Yes	2	Yes	Yes	Killed	Yes	Yes	No	No	No	No
128	JB	sao jose anaxiqui	Interviewee 32	39	tucuxi	No		No	No		No	No	No	No	No	Yes
129	JB	mandioca	Interviewee 33	27	Giant Otter	Yes	3	No	Yes	Died	Yes	No	No	No	No	No
130	JB	mandioca	Interviewee 33	27	boto	Yes	2	Yes	No		Yes	No	No	No	No	No
131	JB	mandioca	Interviewee 33	27	Black Caiman	Yes	1	Yes	Yes	Killed	Yes	Yes	No	Yes	Yes	No
132	JB	mandioca	Interviewee 33	27	tucuxi	No		No	No		No	No	No	No	No	No
133	JB	nova uniao	Interviewee 34	44	Giant Otter	Yes	3	No	No		Yes	No	No	No	No	No
134	JB	nova uniao	Interviewee 34	44	boto	Yes	1	Yes	Yes	Died	Yes	No	No	No	No	No
135	JB	nova uniao	Interviewee 34	44	Black Caiman	Yes	2	Yes	Yes	Killed	Yes	No	Yes	Yes	Yes	No
136	JB	nova uniao	Interviewee 34	44	tucuxi	No		No	No		No	No	No	No	No	No
137	JB	Fortuna	Interviewee 35	42	Giant Otter	Yes	2	Yes	No		Yes	No	No	No		Yes
138	JB	Fortuna	Interviewee 35	42	boto	Yes	3	Yes	Yes	Released	Yes	No	No	No		Yes
139	JB	Fortuna	Interviewee 35	42	Black Caiman	Yes	1	Yes	Yes	Killed	Yes	No	Yes	No		Yes
140	JB	Fortuna	Interviewee 35	42	tucuxi	No		No	No		No	No	No	No		Yes
141	JB	Santo antonio brito	Interviewee 36	28	Giant Otter	Yes	1	Yes	Yes	Died	Yes	Yes	No	No	No	Yes
142	JB	Santo antonio brito	Interviewee 36	28	boto	Yes	3	Yes	Yes	Released	Yes	No	No	No	No	Yes
143	JB	Santo antonio brito	Interviewee 36	28	Black Caiman	Yes	2	Yes	Yes	Killed	No	No	Yes	Yes	Yes	Yes
144	JB	Santo antonio brito	Interviewee 36	28	tucuxi	No		No	No		No	No	No	No	No	Yes
145	JB	Vila nova	Interviewee 37	36	Giant Otter	Yes	3	Yes	Yes	Escaped	Yes	No	No	No	No	Yes
146	JB	Vila nova	Interviewee 37	36	boto	Yes	2	Yes	Yes	Released	Yes	No	No	No	No	Yes
147	JB	Vila nova	Interviewee 37	36	Black Caiman	Yes	1	Yes	Yes	Killed	Yes	No	No	No	No	Yes
148	JB	Vila nova	Interviewee 37	36	tucuxi	No		No	No		No	No	No	No	No	Yes
149	JB	Ressaca	Interviewee 38		Giant Otter	No		No	No		Yes	No	No	No	No	Yes
150	JB	Ressaca	Interviewee 38		boto	Yes	2	Yes	Yes	Released	No	No	No	No	No	Yes
151	JB	Ressaca	Interviewee 38		Black Caiman	Yes	1	Yes	Yes	Killed	Yes	No	No	No	No	No
152	JB	Ressaca	Interviewee 38		tucuxi	No		No	Yes	Released	No	No	No	No	No	Yes
153	JB	roque	Interviewee 39		Giant Otter	Yes	3	No	No		Yes	No	No	No	No	Yes
154	JB	roque	Interviewee 39		boto	Yes	1	Yes	Yes	Released	Yes	Yes	No	No	No	Yes
155	JB	roque	Interviewee 39		Black Caiman	Yes	2	Yes	No		No	No	Yes	No	Yes	No
156	JB	roque	Interviewee 39		tucuxi	No		No	No		No	No	No	No	No	Yes
157	JB	concordia	Interviewee 40	50	Giant Otter	Yes	3	No	No		Yes	No	No	No	No	Yes
158	JB	concordia	Interviewee 40	50	boto	Yes	2	Yes	Yes	Released	Yes	No	No	No	Yes	Yes
159	JB	concordia	Interviewee 40	50	Black Caiman	Yes	1	Yes	Yes	Killed	Yes	Yes	No	No	No	No
160	JB	concordia	Interviewee 40	50	tucuxi	No		No	No		No	No	No	No	No	Yes
161	JB	Estirao carapana	Interviewee 41		Giant Otter	Yes	3	Yes	No		Yes	No	No	No	No	Yes
162	JB	Estirao carapana	Interviewee 41		boto	Yes	2	Yes	Yes	Released	Yes	No	No	No	No	Yes
163	JB	Estirao carapana	Interviewee 41		Black Caiman	Yes	1	Yes	Yes	Killed	No	No	No	No	No	No
164	JB	Estirao carapana	Interviewee 41		tucuxi	No		No	No		No	No	No	No	No	Yes
165	jB	pupunha	Interviewee 42	47	Giant Otter	Yes	3	Yes	Yes	Died	Yes	No	Yes	Yes	Yes	No
166	jB	pupunha	Interviewee 42	47	boto	Yes	2	Yes	Yes	Released	Yes	No	No	No	No	No
167	jB	pupunha	Interviewee 42	47	Black Caiman	Yes	1	Yes	Yes	Killed	Yes	No	Yes	Yes	Yes	No
168	jB	pupunha	Interviewee 42	47	tucuxi	No		No	No		No	No	No	No	No	Yes
169	JB	Volta toari	Interviewee 43	45	Giant Otter	Yes	3	No	No		No	No	No	No	No	Yes
170	JB	Volta toari	Interviewee 43	45	boto	Yes	2	Yes	No		No	No	No	No	No	Yes
171	JB	Volta toari	Interviewee 43	45	Black Caiman	Yes	1	Yes	No		No	No	No	No	No	Yes
172	JB	Volta toari	Interviewee 43	45	tucuxi	No		No	No		No	No	No	No	No	Yes
173	JB	Volta toari	Interviewee 44	27	Giant Otter	Yes	3	No	No		Yes	No	No	No	No	Yes
174	JB	Volta toari	Interviewee 44	27	boto	Yes	1	Yes	No		Yes	No	No	No	No	Yes
175	JB	Volta toari	Interviewee 44	27	Black Caiman	Yes	2	Yes	Yes	Killed	No	No	No	No	No	Yes
176	JB	Volta toari	Interviewee 44	27	tucuxi	No		No	No		No	No	No	No	No	Yes
177	JB	xibauazinho	Interviewee 45	31	Giant Otter	Yes	3	No	No		Yes	No	No	No	No	Yes
178	JB	xibauazinho	Interviewee 45	31	boto	Yes	2	Yes	Yes	Released	No	No	No	No	No	Yes
179	JB	xibauazinho	Interviewee 45	31	Black Caiman	Yes	1	Yes	Yes	Killed	No	No	No	No	No	Yes
180	JB	xibauazinho	Interviewee 45	31	tucuxi	No		No	No		No	No	No	No	No	Yes
181	JB	xibauazinho	Interviewee 46	50	Giant Otter	Yes	3	No	No		Yes	No	No	No	No	Yes
182	JB	xibauazinho	Interviewee 46	50	boto	Yes	2	Yes	Yes	Released	No	No	No	No	No	Yes
183	JB	xibauazinho	Interviewee 46	50	Black Caiman	Yes	1	Yes	Yes	Killed	No	No	No	No	No	Yes
184	JB	xibauazinho	Interviewee 46	50	tucuxi	No		No	No		No	No	No	No	No	Yes
185	JB	boca de xerua	Interviewee 47	64	Giant Otter	Yes	3	No	No		Yes	No	No	No	No	Yes
186	JB	boca de xerua	Interviewee 47	64	boto	Yes	2	Yes	Yes	Released	No	No	No	No	No	Yes
187	JB	boca de xerua	Interviewee 47	64	Black Caiman	Yes	1	Yes	Yes	Killed	No	No	No	No	No	Yes
188	JB	boca de xerua	Interviewee 47	64	tucuxi	No		No	No		No	No	No	No	No	Yes
189	JB	Monte carmelo	Interviewee 48	50	Giant Otter	Yes	2	No	No		Yes	No	No	No	No	Yes
190	JB	Monte carmelo	Interviewee 48	50	boto	Yes	3	Yes	Yes	Released	Yes	No	No	No	No	Yes
191	JB	Monte carmelo	Interviewee 48	50	Black Caiman	Yes	1	Yes	Yes	Killed	Yes	No	No	No	No	Yes
192	JB	Monte carmelo	Interviewee 48	50	tucuxi	No		No	No		Yes	No	No	No	No	Yes
193	JB	sao joao	Interviewee 49	48	Giant Otter	Yes	3	No	No		Yes	No	No	No	No	Yes
194	JB	sao joao	Interviewee 49	48	boto	Yes	2	Yes	Yes	Released	Yes	No	No	No	No	Yes
195	JB	sao joao	Interviewee 49	48	Black Caiman	Yes	1	Yes	Yes	Killed	No	No	No	No	No	Yes
196	JB	sao joao	Interviewee 49	48	tucuxi	No		No	No		No	No	No	No	No	Yes

## Sheet: Jurua Interview Questions
1. What is your age?
2. Does the black caiman, giant otter, boto and tucuxi cause problems for fishing?
3. Can you please rank the black caiman, giant otter, boto and tucuxi in order of greatest problem (1 being the greatest problem and four the least)?
4. Does the black caiman, giant otter, boto and tucuxi damage fishing equipment?
5. Does the black caiman, giant otter, boto and tucuxi get entangled in fishing equipment?
6. What is your most likely response when you find the black caiman, giant otter, boto and tucuxi entangled in fishing equipment?
7. Does the black caiman, giant otter, boto and tucuxi get entangled frighten fish away to other areas?
8. Do you leave an area to fish elsewhere because of the caiman, giant otter, boto and tucuxi fishing locally?
9. Has the black caiman, giant otter, boto and tucuxi been hunted in your community?
10. Have you hunted the black caiman, giant otter, boto and tucuxi in 2013/2014?
11. Have you hunted the black caiman, giant otter, boto and tucuxi in your life?
12. Do you believe you can co-exist with the black caiman, giant otter, boto and tucuxi if future population trends continue to increase?
